# Supplementary material for: Capture and identification of coke precursors to elucidate the deactivation route of the methanol-to-olefin process over H-SAPO-34
Source: Royal Society of Chemistry journal article supplement (doi:10.1039/d0cc02408b), 2020-01-01
Supplement: d0cc02408b1.pdf [file d0cc02408b1.pdf]

## Supporting Information

### Capture and identification of coke precursors to elucidate the deactivation route of methanol to olefins process over H-SAPO-34

Bowen Yu,<sup>ab‡</sup> Wenna Zhang,<sup>‡</sup> Yingxu Wei,<sup>\*a</sup> Xinqiang Wu,<sup>a</sup> Tantan Sun,<sup>ab</sup>  
Benhan Fan,<sup>ab</sup> Shutao Xu<sup>a</sup> and Zhongmin Liu<sup>\*a</sup>

<sup>a</sup> *National Engineering Laboratory for Methanol to Olefins, Dalian National Laboratory for Clean Energy, iChEM (Collaborative Innovation Center of Chemistry for Energy Materials), Dalian Institute of Chemical Physics, Chinese Academy of Sciences, Dalian 116023, P. R. China.*

<sup>b</sup> *University of Chinese Academy of Sciences, Beijing 100049, P. R. China*

*E-mail: weiyx@dicp.ac.cn; liuzm@dicp.ac.cn*

## Contents

### 1. Catalyst Characterizations

1.1 Material Synthesis

1.2 Powder X-ray Diffraction (XRD)

1.3 Scanning Electron Microscopy (SEM)

1.4 <sup>1</sup>H and <sup>29</sup>Si MAS NMR spectra

### 2. Experimental and Theoretical section

2.1 Product Distribution of Methanol to Olefins

2.2 <sup>1</sup>H-<sup>13</sup>C CP MAS NMR experiment

2.3 TG analysis

2.4 Theoretical calculation for the conversation of coke

precursor

# 1. Catalyst Characterizations

## 1.1 Material Synthesis

H-SAPO-34 ( $n_{\text{Si}}/(n_{\text{Si}}+n_{\text{Al}}+n_{\text{P}})=0.06$ ) was synthesized following the procedure described in the literature.<sup>1</sup> SAPO-34 was synthesized by a hydrothermal method with diethylamine (DEA) as a template.

## 1.2 Powder X-ray Diffraction (XRD)

Powder X-ray diffraction (XRD) pattern of H-SAPO-34 was recorded on a PANalytical X'Pert PRO X-ray diffractometer equipped with Cu K $\alpha$  radiation ( $\lambda = 0.15418$  nm) from 5 and 40° with a scan speed of  $2\theta = 5.0$  °/min at 40 kV and 40 mA. The powder XRD pattern of SAPO-34 catalyst with high crystallinity was presented in Figure S1.

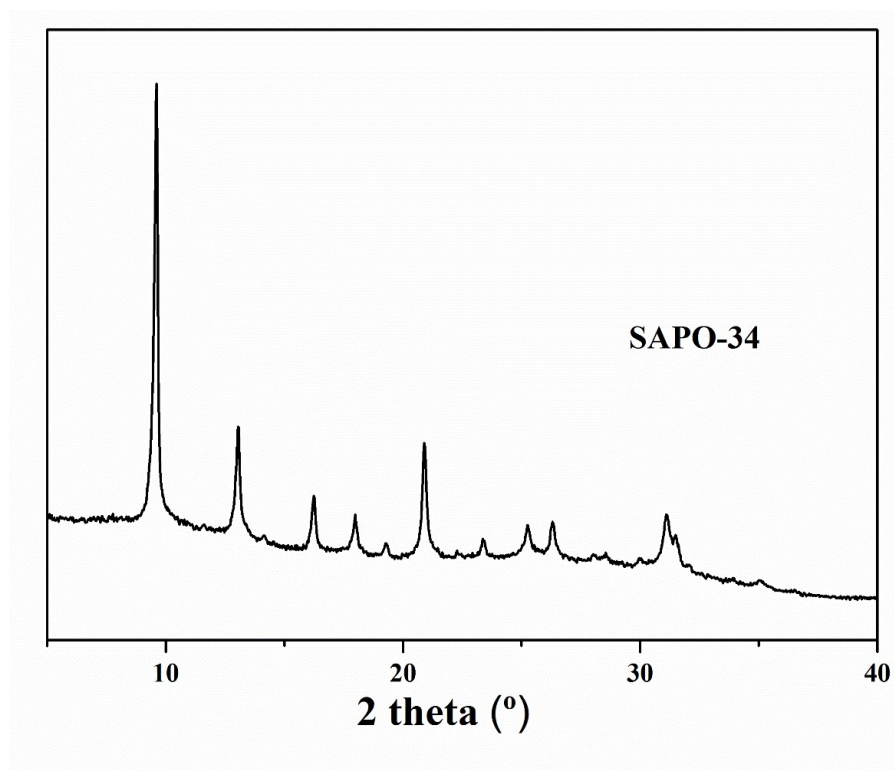

**Fig. S1** XRD patterns of H-SAPO-34 catalysts.

## 1.3 Scanning Electron Microscopy (SEM)

A HITACHI SU8020 Scanning Electron Microscope was employed to investigate the crystal size and morphology of H-SAPO-34 catalyst.

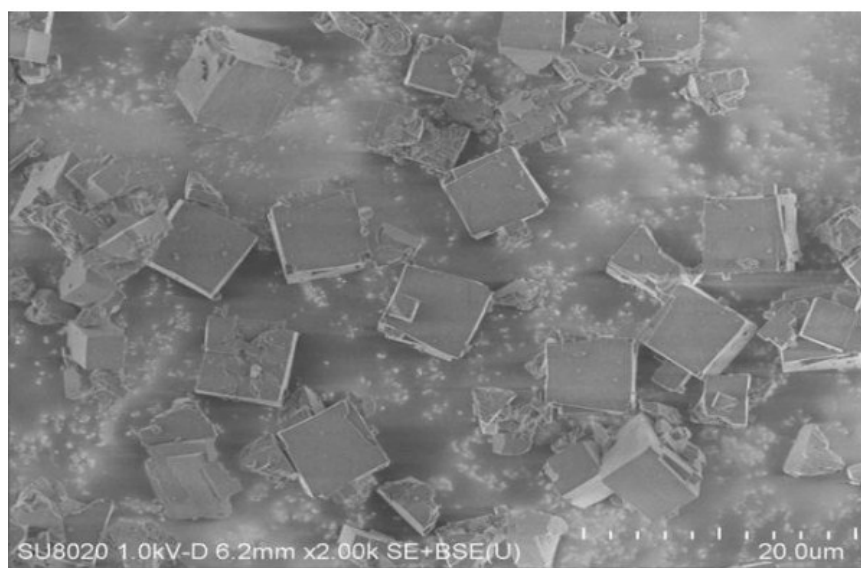

**Fig. S2** SEM images of H-SAPO-34 molecular sieves

#### **1.4 $^1\text{H}$ and $^{29}\text{Si}$ MAS NMR spectra**

$^1\text{H}$  NMR and  $^{29}\text{Si}$  NMR experiments were performed on a Bruker Avance III 600 spectrometer equipped with 14.1T wide-bore magnet. The resonance frequencies in this field strength were 119.2 MHz and 600.13 MHz for  $^{29}\text{Si}$ ,  $^1\text{H}$  respectively. The  $^{29}\text{Si}$  MAS NMR spectrum was recorded with a high power proton decoupling sequence with a spinning rate of 8 kHz. Chemical shifts of  $^{29}\text{Si}$  NMR spectrum was referenced to kaolinite at -91.5 ppm. Prior to  $^1\text{H}$  MAS NMR experiments, catalysts were pretreated at 693 K for 15 h under vacuum to completely remove adsorbed water and impurities in pore space. The  $^1\text{H}$  MAS NMR spectrum was recorded with onepulse sequence with a spinning rate of 12 kHz, and chemical shifts were referenced to adamantane at 1.74 ppm.

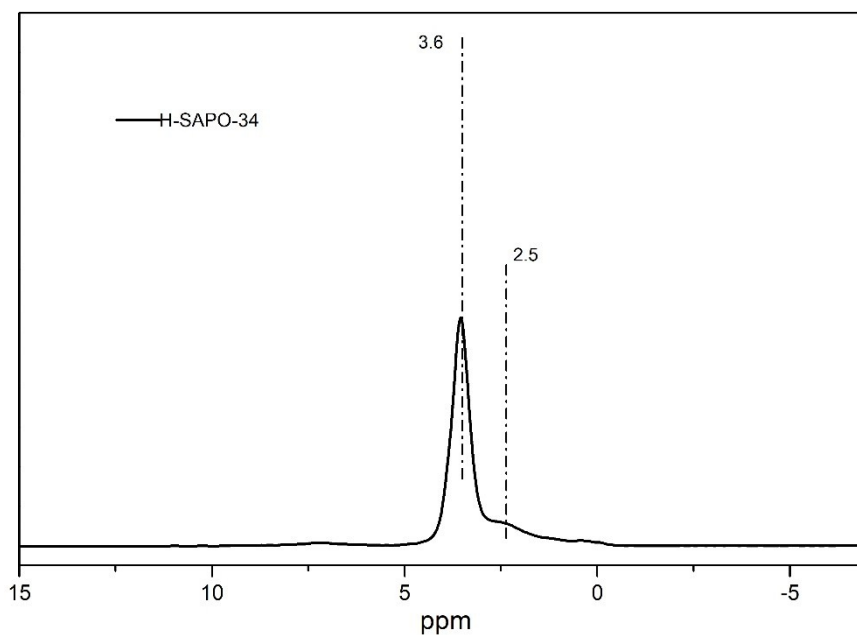

**Fig. S3**  $^1\text{H}$  MAS NMR spectra of H-SAPO-34-(Si/Si+Al+P=0.06 in molar ratio).

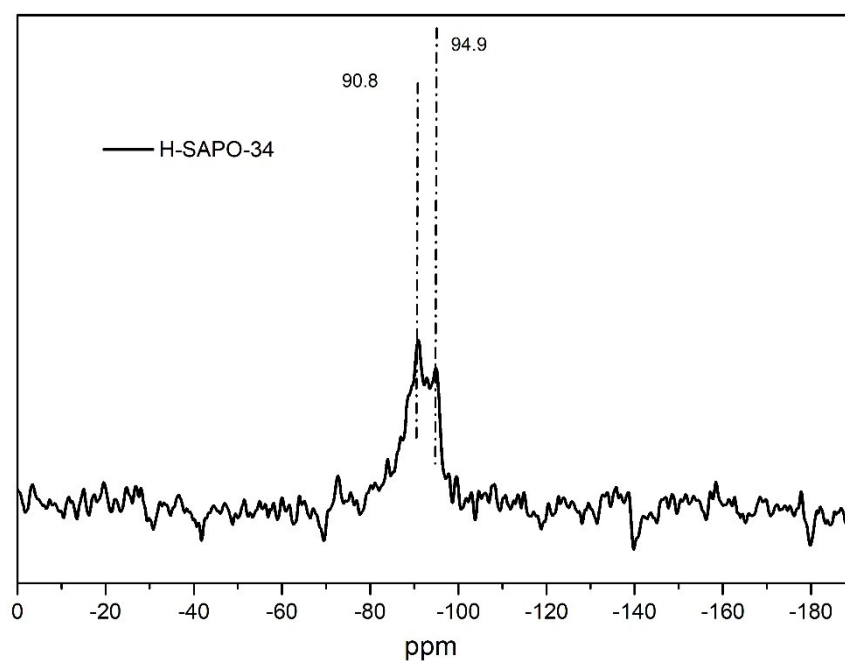

**Fig. S4**  $^{29}\text{Si}$  MAS NMR spectra of H-SAPO-34 (Si/Si+Al+P=0.06 in molar ratio).

## 2. Experimental and Theoretical section

### 2.1 Product Distribution of Methanol to Olefins Conversion

Methanol conversion was performed in a fixed-bed quartz tubular reactor at atmospheric pressure. A catalyst sample of 33.3 mg (40-60 mesh) was loaded into the reactor and the reactions was carried out at 350 °C. Methanol was fed by passing helium through a saturation evaporator with a WHSV of 6.0  $\text{h}^{-1}$ . The reaction products were analyzed by an on-line gas

chromatograph (Agilent GC 7890A) equipped with an HP-PLOT Q capillary column and a FID detector. The conversion and selectivity were calculated on a  $\text{CH}_2$  basis. Dimethyl ether (DME) was considered as a reactant in the calculation.

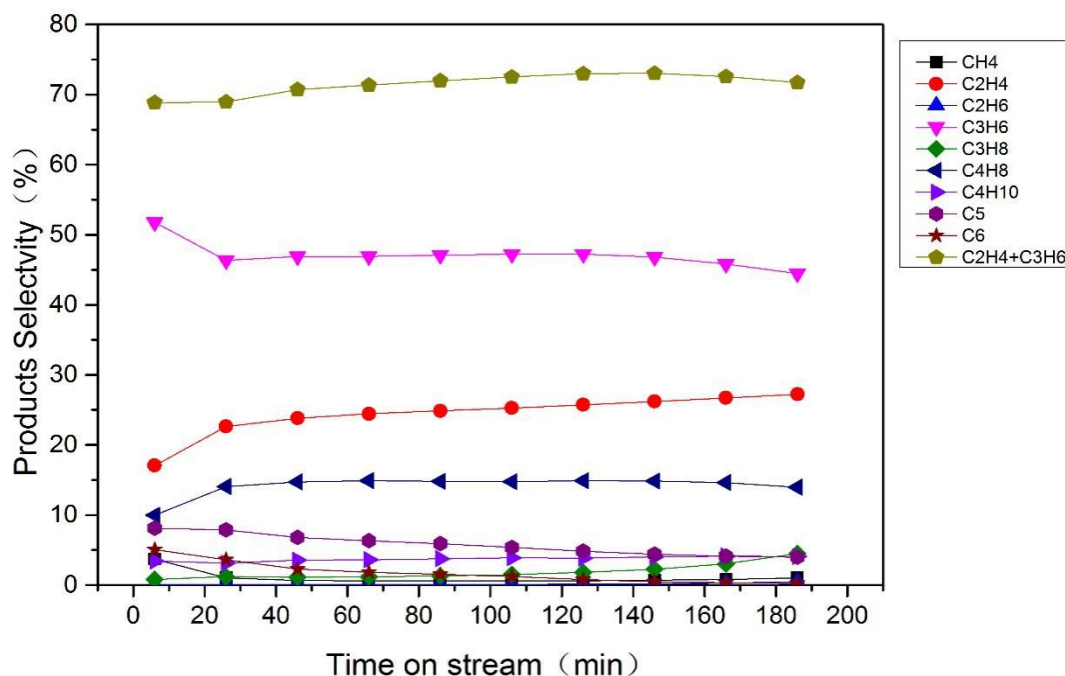

**Fig. S5** The gas phase products distribution of MTO reaction with time on stream over H-SAPO-34 at 350 °C, WHSV=6 h<sup>-1</sup>.

## 2.2 <sup>1</sup>H-<sup>13</sup>C CP MAS NMR experiment

Solid-state NMR spectra were recorded on a Bruker Avance III 600 MHz spectrometer equipped with a 14.1 T wide-bore magnet. <sup>13</sup>C MAS NMR spectra were collected at 150.9 MHz with a 3.2 mm HXY probe using a <sup>1</sup>H→<sup>13</sup>C cross polarization (CP) pulse sequence with a spinning speed of 8 kHz. The chemical shifts were referenced to adamantane with the up field methine peak at 29.5 ppm. The <sup>13</sup>C CP/MAS NMR spectra were acquired with a contact time of 3 ms and relaxation delay of 2 s.

Two distinct regions of aliphatic carbon (10-30 ppm) and aromatic carbon (120-137 ppm) were observed. Signals at 19-21 ppm accompanied by signals at 128 and 134 ppm confirm the formation of polymethyl-substituted benzenes. The occurrence of signals at 125-137 ppm reveal the formation of polycyclic aromatics combined with the analysis and identification of these retained organics by GC-MS. Moreover, the intensity of naphthalene derivatives and

polycyclic aromatics increase with time on-stream and these evolving trends virtually coincide with the results obtained from GC-MS.

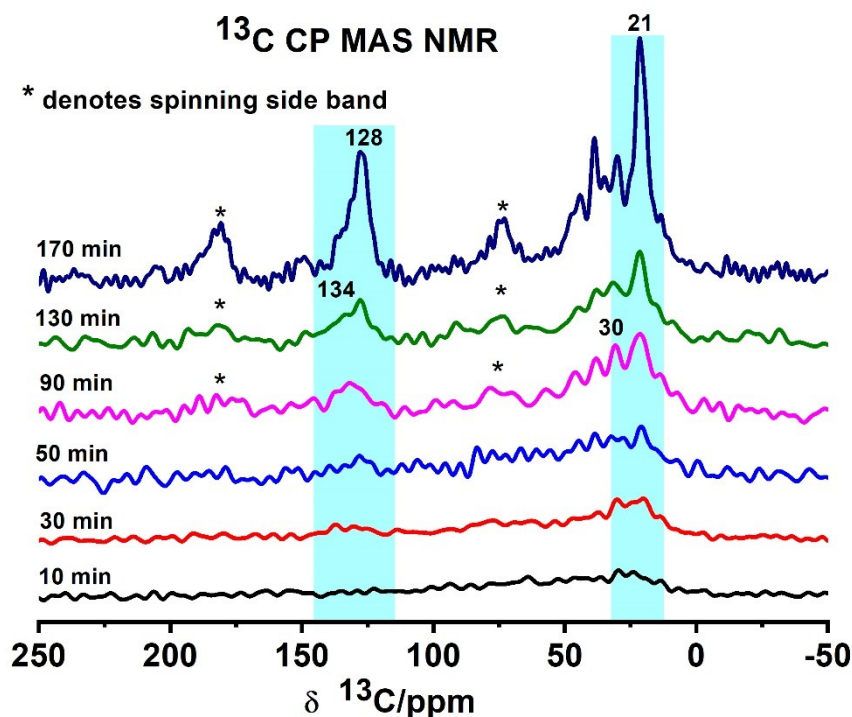

**Fig. S6**  $^{13}\text{C}$  MAS NMR spectra of retained organic species in H-SAPO-34 with time on stream over H-SAPO-34 after methanol conversion at 350 °C and WHSV of 6 h<sup>-1</sup>.

### 2.3 TG analysis

The total amount coke was analyzed by thermogravimetric analysis (TGA). 10mg of the spent catalyst was heated with 10 °C/min heating rate to 800 °C and was held isothermal for 1 h.

### 2.4 Theoretical calculation for the conversation of coke precursor

For theoretical calculations, a 74 T cluster model ( $\text{Al}_{37}\text{SiP}_{36}\text{O}_{119}$ ) represents the structure of H-SAPO-34 zeolite, which were extracted from the crystallographic data from the structure of CHA. In the theoretical calculations for the extended zeolite model, one P atom was then replaced by Si atom (see **Fig. S7**). And the locations of acid sites O(2) were chosen at the 8-ring window that is easy access by adsorbents and has maximum reaction space<sup>2, 3</sup>.

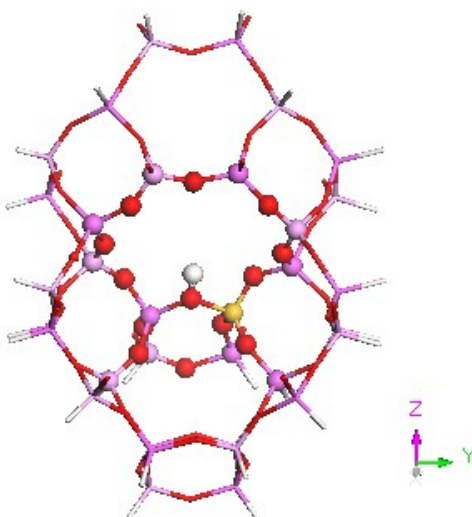

**Fig. S7** Representations of H-SAPO-34 framework structures by 74T cluster models.

The combined theoretical ONIOM method<sup>4-6</sup> was applied to predict the geometries of various adsorption structures and transition states (TS). During the structure optimizations,  $\omega$ B97XD hybrid density function with 6-31G(d, p) basis sets and semi-empirical AM1 were employed for optimizing geometries of the high-level layer and low-level layer. The  $\omega$ B97XD method is the hybrid meta DFT developed by Chai and Head-Gordon, where implicitly accounts for empirical dispersion and can describe long-range dispersion interactions well with respect to the traditional DFT methods<sup>7</sup>. To preserve the integrity of the zeolite structure during the structure optimizations, the 8-ring window,  $(\text{SiO})_3\text{-Si-OH-Al-(SiO)}_3$  active center and the adsorbed species in the high-level layer were relaxed while the rest of atoms were fixed in the low-level at their crystallographic locations. To obtain high accurate energies, the single-point energies were calculated at the level of  $\omega$ B97XD /6-31G(d,p). The frequency calculations were performed at the same level as geometry optimizations to check whether the saddle points exhibit the proper number of imaginary frequencies. Only a single imaginary frequency was observed for the transition state. The energies reported here have been corrected for zero-point vibration energies. All density functional theory (DFT) calculations were performed with the Gaussian 09 package<sup>8</sup>. The intrinsic free energies ( $\Delta G^\ddagger$ ) are obtained from the  $\omega$ B97XD/6-31G(d, p) total electronic energies and the thermal correction from the  $\omega$ B97XD/6-31G(d,p):AM1 frequency calculations at 623 K. The reaction rate constants were obtained through transition state theory (TST) as implemented in the TAMkin program<sup>9</sup>, which was developed by Van Speybroeck's group.

## References

- 1 G.Liu, P. Tian, J. Li, D, Zhang, F, Zhou and Z,Liu, *Microporous Mesoporous Mater.* 2008, **111**, 143–149.
- 2 J. D. Padraig J. O'Malley, *Zeolites* 1988, **8**, 317-321.
- 3 L. A. Clark, M. Sierka and J. Sauer, *J. Am. Chem. Soc.* 2004, **126**, 936-947.
- 4 Y. Chu, B. Han, A. Zheng and F. Deng, *J. Phys. Chem. C* 2012, **116**, 12687-12695.
- 5 D. Lesthaeghe, B. De Sterck, V. Van Speybroeck, G. B. Marin and M. Waroquier, *Angew. Chem., Int. Ed.* 2007, **46**, 1311-1314.
- 6 D. K. Papayannis, K. D. Papavasileiou and V. S. Melissas, *Microporous Mesoporous Mater.* 2016, **226**, 1-9.
- 7 J. D. Chai and M. Head-Gordon, *Phys. Chem. Chem. Phys.* 2008, **10**, 6615-6620.
- 8 M. J. F. G.W.Trucks, H.B. Schlegel, G.E. Scuseria, J.R.Cheeseman, M.A., G. S. Robb, V. Barone, B. Mennucci, H.Nakatsuji, G.A. Petersson, M., X. L. Caricato, H.P. Hratchian, J.Bloino, A.F. Izmaylov, G. Zheng, J.L. Son, M. H. nenberg, K.Toyota, M. Ehara, R. Fukuda, J. Hasegawa, M. Ishida, T., O. K. Nakajima, Y. Honda, H. Naka, T. Vreven, J.A. Montgomery,, J. E. P. F.Ogliaro, M. Bearpark, J.J. Heyd, E. Brothers, K.N. Kudin,, V. N. S. R.Kobayashi, J. Normand, K. Raghavachari, J.C.Burant, A., S. S. I. Rendell, J. Tomasi, M. Cossi, N. Rega, M.Klene, J.M. Millam,, J. B. C. J.E. Knox, V. Bakken, J.Jaramillo, C. Adamo, R. Gomperts, R.E., O. Y. Stratmann, R.Cammi, A.J. Austin, C. Pomelli, J.W. Ochterski, R.L., V. G. Z. Martin, K. Morokuma, G.A. Voth, P. Salvador, S.Dap, J. J. D. prich, A.D. Daniels, O. Farkas, J.V.Ortiz, J.B. Foresman, J. and D. J. F. Cioslowski, *Gaussian 09, Revision B.01*, Wallingford, CT 2010.
- 9 A. Ghysels, T. Verstraelen, K. Hemelsoet, M. Waroquier and V. Van Speybroeck, *J. Chem. Inf. Model.* 2010, **50**, 1736-1750.
